# Supplementary material for: The genomics of rapid climatic adaptation and parallel evolution in North American house mice
Source: PLoS Genet. 2021 Apr 29;17(4):e1009495. doi: 10.1371/journal.pgen.1009495 (PMC8084166; doi:10.1371/journal.pgen.1009495)
Supplement: S3 Table — (XLSX) [file pgen.1009495.s003.xlsx]

## Sheet: Sheet1
Table S3. Exon capture sequencing coverage statistics of data for each mouse in the western transect on a HiSeq 4000.
Library	rawData(Mb)	cleanedData(Mb)	DataMapped(Mb)	Specificity(%)*	Sensitivity(%)†	AvgCoverage	CoverageVar	AvgCoverageStd	Sites2X(%)	Sites5X(%)	Sites10X(%)	Sites20X(%)
DL007_S51	5946.19	3736.79	2244.01	60.05	91.22	30.68	1492.24	38.63	90.48	87.34	77.44	51.23
DL008_S50	6518.4	3954.24	2305.99	58.32	91.27	31.66	1608.94	40.11	90.64	87.91	78.77	52.92
MPR170_S45	6928.1	4248.26	2517.48	59.26	91.25	34.27	1884.48	43.41	90.6	88.11	80.16	57.02
MPR171_S46	6686.87	4110.75	2406.02	58.53	91.23	32.84	2113.84	45.98	90.47	87.29	77.24	51.39
MPR172_S47	5648.2	3536.33	2161.39	61.12	91.18	29.41	1544.26	39.3	90.39	86.64	75	47.27
MPR173_S48	6824.24	4236.97	2602.69	61.43	91.45	35.44	2008.03	44.81	90.85	88.47	80.8	57.85
TAS010_S1	5373.57	3354.2	2005.79	59.8	91.2	27.18	943.35	30.71	90.4	86.89	76.12	49.15
TAS011_S2	6041.25	3655.03	2165.47	59.25	91.18	29.31	1067.19	32.67	90.42	87.23	77.52	52.24
TAS012_S3	6835.99	4123.39	2587.55	62.75	91.25	34.88	1444.9	38.01	90.67	88.64	82.29	61.84
TAS013_S4	6137.02	3738.2	2251.66	60.23	91.13	30.28	1291.2	35.93	90.38	87.27	77.59	51.85
TAS014_S5	7015.39	4387.09	2589.32	59.02	91.13	35.26	2160.88	46.49	90.44	87.68	79.2	55.56
TAS015_S6	6065.1	3691.26	2171.25	58.82	91.08	29.26	1434.3	37.87	90.16	86.11	74.17	46.88
TAS016_S7	6481.13	4118.67	2540.18	61.67	91.43	34.43	1470.21	38.34	90.84	88.72	81.9	60.63
TAS017_S8	5398.99	3372.79	2056.3	60.97	91.2	27.93	1287.64	35.88	90.39	86.65	74.85	46.14
TAS021_S9	7595.73	4527.02	2704.93	59.75	91.42	36.49	2070.36	45.5	90.81	88.49	80.89	58.56
TAS022_S10	7644.31	4718.76	2746.23	58.2	91.31	37.38	2031.33	45.07	90.74	88.69	82.06	61.22
TAS028_S12	7918.94	5003.77	2869.73	57.35	91.16	39.01	3294.52	57.4	90.49	87.94	80.31	58.45
TAS027_S11	7166.09	4313.3	2659.68	61.66	91.38	35.91	1474.03	38.39	90.85	89.1	83.44	63.79
TAS029_S13	6111.62	3727.52	2302.67	61.77	91.13	30.98	1495.87	38.68	90.39	87.31	77.64	51.86
TAS030_S14	6322.7	3934.66	2422.87	61.58	91.24	32.71	1641.24	40.51	90.54	87.72	78.86	54.44
TAS031_S15	6675.8	4241.98	2495.56	58.83	91.44	34.03	2013.82	44.88	90.78	87.99	78.99	54.13
TAS032_S16	7130.83	4484.28	2680.18	59.77	91.58	36.42	2053.66	45.32	91.01	88.82	81.58	59.35
TAS038_S17	6647.16	4114.88	2564.74	62.33	91.5	34.82	1677.89	40.96	90.97	89.19	83.33	63.22
TAS039_S18	5807.52	3628.65	2274.93	62.69	91.35	30.81	966.45	31.09	90.76	88.6	81.49	58.65
TAS040_S19	6035.48	3884.27	2299.49	59.2	91.22	31.22	1674.57	40.92	90.53	87.68	78.73	53.75
TAS047_S20	6061.56	3850.34	2241.22	58.21	91.13	30.49	1579.72	39.75	90.34	86.8	75.92	49.11
TAS048_S21	6398.46	3962.3	2353.26	59.39	91.06	31.73	1729.71	41.59	90.29	87.13	77.24	51.4
TAS049_S22	5651.88	3611.47	2193.58	60.74	91.19	29.75	1294.68	35.98	90.43	87.17	77	50.59
TAS050_S23	5414.78	3512.47	2027.45	57.72	91.26	27.66	1270.23	35.64	90.39	86.32	73.86	45.17
TAS051_S24	6217.15	4018.44	2284.47	56.85	91.44	31.34	1542.16	39.27	90.75	87.68	77.88	52.08
TAS052_S25	7005.32	4484.75	2580.72	57.54	91.34	35.58	2282.34	47.77	90.71	88.1	79.81	56.54
TAS055_S26	5478.05	3509.28	2072.96	59.07	91.2	28.27	1046.1	32.34	90.42	87.15	77.18	51.43
TAS061_S27	6245.73	3841.14	2318.87	60.37	91.11	31.24	1593.09	39.91	90.37	87.23	77.49	51.64
TAS062_S28	6275.49	3967.89	2355.45	59.36	91.14	31.91	1495.76	38.68	90.41	87.57	78.74	54.15
TAS063_S29	6620.3	4082.9	2475.43	60.63	91.14	33.51	1800.1	42.43	90.44	87.68	79.1	55.08
TAS066_S30	6383.14	3954.27	2430.16	61.46	91.18	32.97	1585.32	39.82	90.5	87.9	79.66	55.8
TAS082_S31	7565.23	4598.79	2737.63	59.53	91.32	37.1	2454.25	49.54	90.71	88.34	80.66	57.94
TAS088_S32	7310.1	4431.46	2417.06	54.54	91.51	32.74	1837.19	42.86	90.74	87.77	78.28	52.67
TAS097_S33	6677.4	4226.62	2557.78	60.52	91.51	35.02	1631.94	40.4	90.98	89.06	82.42	60.72
TAS103_S34	7469.63	4645.32	2929.03	63.05	91.35	39.35	2076.93	45.57	90.83	89.1	83.56	64.83
TAS105_S35	6011.4	3775.46	2285.38	60.53	91.17	30.76	1150.16	33.91	90.48	87.84	79.49	55.36
TAS106_S36	5907.55	3454.55	2129.4	61.64	91.23	28.83	771.16	27.77	90.53	87.89	79.87	56.85
TAS113_S37	6861.19	4100.21	2593.54	63.25	91.19	35.03	1821.38	42.68	90.57	88.3	81.02	58.78
TAS119_S38	7315.93	4463.13	2705.77	60.62	91.28	36.72	1799.76	42.42	90.71	88.85	83.13	64.02
TAS126_S39	5437.46	3350.65	2143.08	63.96	91.3	28.98	791.81	28.14	90.7	88.48	81.15	57.72
TAS131_S40	7431.29	4604.63	2859.54	62.1	91.53	38.9	1709.61	41.35	91.05	89.49	84.69	67.73
TAS187_S41	5975.58	3849.35	2318.47	60.23	91.38	31.46	1218	34.9	90.76	88.3	80.26	56.38
TAS189_S42	6432.99	4014.47	2451.08	61.06	91.38	33.19	1169.86	34.2	90.83	88.86	82.45	61.34
TAS191_S43	7896.05	4842.97	2864.91	59.16	91.34	38.86	2350.08	48.48	90.76	88.68	82.23	61.92
TAS192_S44	7430.19	4563.98	2813.3	61.64	91.36	38.14	1912.99	43.74	90.83	89	83.22	63.97
* Specificity for exome capture is the proportion of the data that mapped to the targeted sequence: Specificity = (number of bases mapped to targeted regions) / (total number of mapped bases)
† Sensitivity for exome capture is the proportion of targeted bases that were sequenced: Sensitivity = (number of targeted bases with at least one read support)/(total number of targeted bases)
