# Supplementary material for: The genomics of rapid climatic adaptation and parallel evolution in North American house mice
Source: PLoS Genet. 2021 Apr 29;17(4):e1009495. doi: 10.1371/journal.pgen.1009495 (PMC8084166; doi:10.1371/journal.pgen.1009495)
Supplement: S5 Table — (XLSX) [file pgen.1009495.s005.xlsx]

## Sheet: Sheet1
Table S5. Pairwise Fst calculated using exome capture data among the western transect populations: Tucson, AZ, USA (TUC); St. Geogrge, UT, USA (STG); Provo, UT, USA (PRO); Missoula, MT, USA (MIS); Edmonton, Alberta, Canada (EDM).
Fst
	TUC	STG	PRO	MIS	EDM
TUC	0
STG	0.1411	0
PRO	0.135	0.0523	0
MIS	0.1212	0.0959	0.082	0
EDM	0.1229	0.1383	0.1301	0.1115	0
